# Supplementary material
Source: PubMed Central journal article supplement (PMC14620)

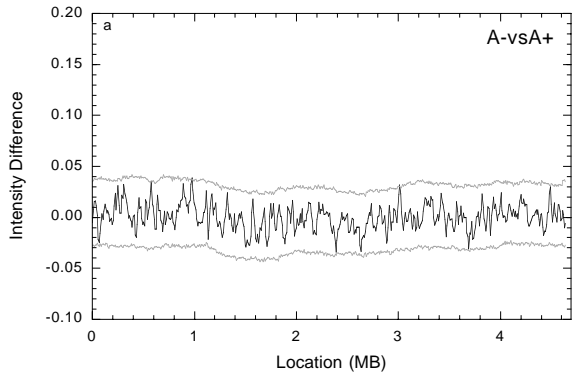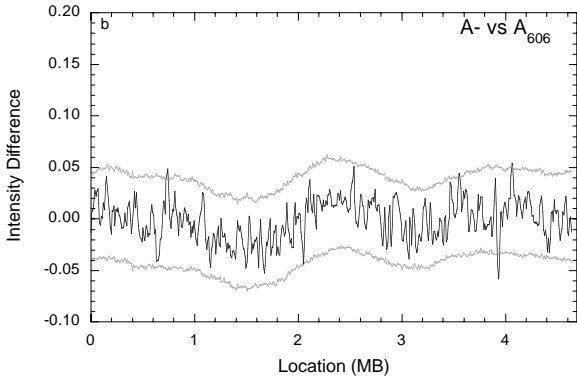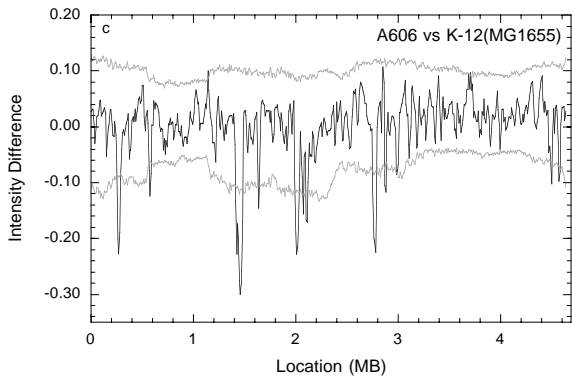

Supplement: pnas_021448998_2.pdf [file pnas_021448998_2.pdf]
